# Supplementary material for: The Purification and Characterization of a Cutinase-like Enzyme with Activity on Polyethylene Terephthalate (PET) from a Newly Isolated Bacterium Stenotrophomonas maltophilia PRS8 at a Mesophilic Temperature
Source: MDPI journal article supplement (doi:10.3390/app13063686), 2023-03-14
Supplement: s1 [file s1]

Archive with 1 entries (1 files):
- applsci-2116370-supplementary.pdf
