# Supplementary material for: The Purification and Characterization of a Cutinase-like Enzyme with Activity on Polyethylene Terephthalate (PET) from a Newly Isolated Bacterium Stenotrophomonas maltophilia PRS8 at a Mesophilic Temperature
Source: MDPI journal article supplement (doi:10.3390/app13063686), 2023-03-14
Supplement: s1 [file s1 › applsci-2116370-supplementary.pdf]

## Supplementary Materials

### **Purification and characterization of a cutinase-like enzyme with activity on Polyethylene terephthalate (PET), from a newly isolated bacterium *Stenotrophomonas maltophilia* PRS8 at mesophilic temperature**

Salah Ud Din<sup>1,2,3</sup>, Kalsoom<sup>1,2</sup>, Sadia Mehmood Satti<sup>4</sup>, Salah Uddin<sup>1</sup>, Smita V. Mankar<sup>5</sup>, Esma Ceylan<sup>2</sup>, Fariha Hasan<sup>1</sup>, Samiullah Khan<sup>1</sup>, Malik Badshah<sup>1</sup>, *Ali Osman Beldüz*, Sabriye Çanakçı<sup>2</sup>, Baozhong Zhang<sup>5</sup>, Javier A Linares-Pastén<sup>3,\*</sup> and Aamer Ali Shah<sup>1,\*</sup>

<sup>1</sup> Department of Microbiology, Faculty of Biological Sciences, Quaid-i-Azam University, Islamabad 45320, Pakistan

<sup>2</sup> Department of Biology, Karadeniz Technical University, Trabzon, Turkey

<sup>3</sup> Division of Biotechnology, Department of Chemistry, Faculty of Engineering (LTH), Lund University, P.O. Box 124, SE-22100 Lund, Sweden

<sup>4</sup> Department of Microbiology, Kohsar University Murree, Pakistan

<sup>5</sup> Centre for Analysis and Synthesis, Department of Chemistry, Faculty of Engineering (LTH), Lund University, Lund, Sweden

\* Correspondence: alishah@qau.edu.pk; javier.linares

### S1. UV PET treatment

The plastic PET film was exposed to UVB light at 280nm for 10 minutes, which was significantly shorter than the UV exposure time (Much longer exposure times, 14 days, can affect the PET structure [1]). The distance between the PET plastic and UV Lamp was 30.5 cm. There was no significant difference when it was exposed to a UV lamp.

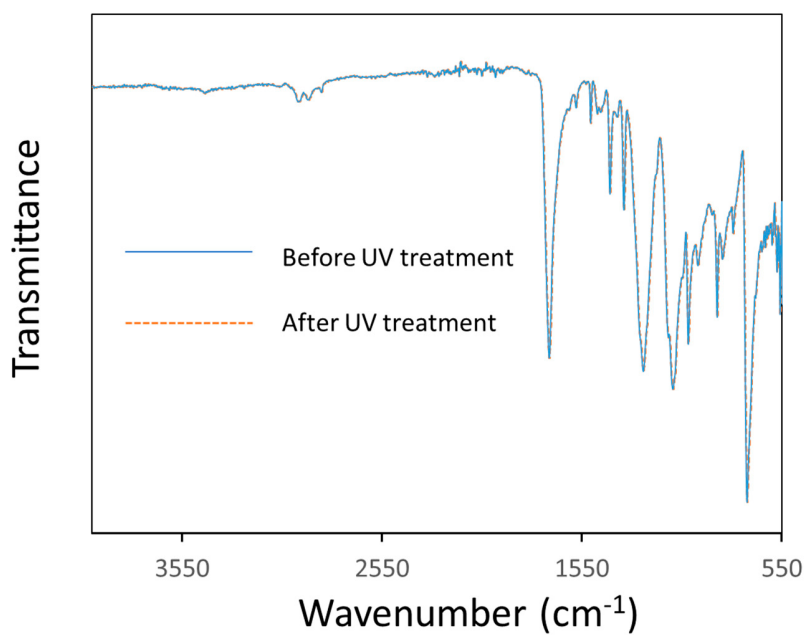

**Figure S1.** FT-IR spectra of PET flakes before and after UV exposure. The data is normalized at 1410 cm<sup>-1</sup>. No differences are detectable.

### Reference

1. Falkenstein, P.; Gräning, D.; Bielytskyi, P.; Zimmermann, W.; Matysik, J.; Wei, R.; Song, C. UV pretreatment impairs the enzymatic degradation of polyethylene terephthalate. *Frontiers in Microbiology* 2020, 11, 689.

## S2. Experimental Design

### Plackett Burman Design (PDB) for optimizing of nutritional condition

The PBD developed by Design Expert 10.1 software (Stat-Ease Inc. Minneapolis) was used to screen various dietary ingredients for optimum cutinase-like enzyme production from *S. maltophilia* PRS8. The design was mathematically modelled using the first-order polynomial equation listed below (Eq. 1).

$$Y = \beta_0 + \sum \beta_i X_i \quad (\text{Eq. 1})$$

Where Y represents specific activity (U/mg) of cutinase of the predicted response;  $\beta_0$  exhibited the intercept;  $\beta_i$  linear coefficient of the model, while  $X_i$  described the level of independent variable. A total of 10 components were optimized by Plackett Burman design which included glucose  $(\text{NH}_4)_2\text{SO}_4$ , sucrose,  $\text{NaNO}_3$ ,  $\text{K}_2\text{HPO}_4$ , Yeast Extract,  $\text{MgSO}_4 \cdot 7\text{H}_2\text{O}$ , KCl,  $\text{FeSO}_4 \cdot 7\text{H}_2\text{O}$ , cutin and  $\text{Na}_2\text{HPO}_4$ . The effect of these variables was studied on two levels (Tables S1 and S2) of the Design Expert 7 software showed a total of 15 sets of experimentation with varying chemical ingredient concentrations. The cultivation was conducted at 35 °C and 150 rpm. The crude enzyme activity was determined after 24 h intervals up to maximum 72 h and results were recorded to find out specific activity (U/mg) using *p*-NPB as a substrate. All experiments were carried out in triplicates. The significant factors were determined by evaluating the results and factors with *p*-value <0.05 were considered as significant and further analyzed by Central Composite design.

### Central Composite Design (CDC) Experiment

Three significant factors (cutin,  $\text{NaNO}_3$ ,  $(\text{NH}_4)_2\text{SO}_4$ ) derived from PBD were further analyzed through Central Composite design (CCD) to achieve a more extended optimization for high enzyme yield. The effect of independent factors such as linear, quadratic, and mutual interactions on the dependent variable enzyme specific activity (U/mg) was investigated. The mathematical relationship between the dependent variable and the significant independent variable is represented by the quadratic polynomial equation provided:

$$Y = \beta_0 + \sum_{i=1}^6 \beta_i X_i + \sum_{i=1}^6 \beta_{ii} X_i^2 + \sum_{i < j=2}^6 \beta_{ij} X_i X_j \quad (\text{Eq. 2})$$

In this equation Y,  $X_i$ ,  $\beta_i$ ,  $\beta_{ii}$ ,  $\beta_{ij}$ ,  $\beta_0$  are representing the specific activity, significant independent variables, linear regression coefficients, quadratic regression coefficients, interactive regression coefficients and a constant term, respectively (Table S3). ANOVA was used to assess the model's feasibility (Table S4).

**Table S1.** Placket Burman design of factors with specific enzyme activity (U/mg) as response

| Run | Factor<br>Glucose<br>(%) | Factor<br>Yeast<br>Extract<br>(%) | Factor<br>Sucrose<br>(%) | Factor<br>NaNO <sub>3</sub><br>(%) | Factor<br>K <sub>2</sub> HPO <sub>4</sub><br>(%) | Factor<br>MgSO <sub>4</sub><br>7H <sub>2</sub> O (%) | Factor<br>KCl<br>(%) | Factor<br>FeSO <sub>4</sub><br>7H <sub>2</sub> O<br>(%) | Factor<br>Cutin<br>(%) | Factor<br>Na <sub>2</sub> HPO <sub>4</sub><br>(%) | Factor<br>(NH <sub>4</sub> ) <sub>2</sub> SO <sub>4</sub><br>(%) | Response 1<br>Specific Activity<br>U/mg |
|-----|--------------------------|-----------------------------------|--------------------------|------------------------------------|--------------------------------------------------|------------------------------------------------------|----------------------|---------------------------------------------------------|------------------------|---------------------------------------------------|------------------------------------------------------------------|-----------------------------------------|
| 1   | 0.7                      | 0.9                               | 0.50                     | 0.50                               | 0.20                                             | 0.02                                                 | 0.90                 | 0.01                                                    | 0.60                   | 0.20                                              | 0.30                                                             | 247.59                                  |
| 2   | 0.7                      | 0.3                               | 1.10                     | 0.10                               | 0.20                                             | 0.08                                                 | 0.03                 | 0.01                                                    | 0.60                   | 0.60                                              | 0.30                                                             | 131.65                                  |
| 3   | 0.7                      | 0.9                               | 1.10                     | 0.50                               | 0.08                                             | 0.02                                                 | 0.03                 | 0.01                                                    | 0.20                   | 0.60                                              | 0.50                                                             | 162.54                                  |
| 4   | 1.3                      | 0.9                               | 0.50                     | 0.10                               | 0.08                                             | 0.08                                                 | 0.03                 | 0.01                                                    | 0.60                   | 0.20                                              | 0.50                                                             | 222.53                                  |
| 5   | 0.7                      | 0.3                               | 0.50                     | 0.50                               | 0.08                                             | 0.08                                                 | 0.90                 | 0.00                                                    | 0.60                   | 0.60                                              | 0.50                                                             | 211.55                                  |
| 6   | 1.3                      | 0.9                               | 1.10                     | 0.10                               | 0.08                                             | 0.02                                                 | 0.90                 | 0.00                                                    | 0.60                   | 0.60                                              | 0.30                                                             | 169.97                                  |
| 7   | 0.7                      | 0.3                               | 0.50                     | 0.10                               | 0.08                                             | 0.02                                                 | 0.03                 | 0.00                                                    | 0.20                   | 0.20                                              | 0.30                                                             | 46.85                                   |
| 8   | 0.7                      | 0.9                               | 1.10                     | 0.10                               | 0.20                                             | 0.08                                                 | 0.90                 | 0.00                                                    | 0.20                   | 0.20                                              | 0.50                                                             | 93.1                                    |
| 9   | 1.0                      | 0.6                               | 0.80                     | 0.30                               | 0.14                                             | 0.05                                                 | 0.47                 | 0.00                                                    | 0.40                   | 0.40                                              | 0.40                                                             | 111.51                                  |
| 10  | 1.0                      | 0.6                               | 0.80                     | 0.30                               | 0.14                                             | 0.05                                                 | 0.47                 | 0.00                                                    | 0.40                   | 0.40                                              | 0.40                                                             | 119.65                                  |
| 11  | 1.0                      | 0.6                               | 0.80                     | 0.30                               | 0.14                                             | 0.05                                                 | 0.47                 | 0.00                                                    | 0.40                   | 0.40                                              | 0.40                                                             | 113.09                                  |
| 12  | 1.3                      | 0.3                               | 0.50                     | 0.10                               | 0.20                                             | 0.02                                                 | 0.90                 | 0.01                                                    | 0.20                   | 0.60                                              | 0.50                                                             | 146.20                                  |
| 13  | 1.3                      | 0.3                               | 1.10                     | 0.50                               | 0.08                                             | 0.08                                                 | 0.90                 | 0.01                                                    | 0.20                   | 0.20                                              | 0.30                                                             | 131.46                                  |
| 14  | 1.3                      | 0.3                               | 1.10                     | 0.50                               | 0.20                                             | 0.02                                                 | 0.03                 | 0.00                                                    | 0.60                   | 0.20                                              | 0.50                                                             | 313.96                                  |
| 15  | 1.3                      | 0.9                               | 0.50                     | 0.50                               | 0.20                                             | 0.08                                                 | 0.03                 | 0.00                                                    | 0.20                   | 0.60                                              | 0.30                                                             | 155.26                                  |

**Table S2.** ANNOVA for Placket-Burman Design

| Source                                            | Sum of Squares | Degree of Freedom | Means Square | F Value | p-value<br>prob>F |
|---------------------------------------------------|----------------|-------------------|--------------|---------|-------------------|
| Model                                             | 54429.80       | 10                | 5442.98      | 9.56    | 0.0445            |
| A-Glucose                                         | 5046.98        | 1                 | 5046.98      | 8.87    | 0.0587            |
| B-Yeast extract                                   | 400.49         | 1                 | 400.49       | 0.70    | 0.4631            |
| C-Sucrose                                         | 62.07          | 1                 | 62.07        | 0.11    | 0.7629            |
| D-NaNO <sub>3</sub>                               | 14149.43       | 1                 | 14149.43     | 24.86   | 0.0155            |
| E-K <sub>2</sub> HPO <sub>4</sub>                 | 1700.50        | 1                 | 1700.50      | 2.99    | 0.1823            |
| F-MgSO <sub>4</sub> ·7H <sub>2</sub> O            | 713.02         | 1                 | 713.02       | 6.60    | 0.124             |
| G-KCl                                             | 90.24          | 1                 | 90.24        | 0.16    | 0.7171            |
| H-FeSO <sub>4</sub> ·7H <sub>2</sub> O            | 219.18         | 1                 | 219.18       | 0.39    | 0.5788            |
| I-(NH <sub>4</sub> ) <sub>2</sub> SO <sub>4</sub> | 5944.86        | 1                 | 5944.86      | 10.45   | 0.0481            |
| J-Cutin                                           | 26304.84       | 1                 | 26304.84     | 46.22   | 0.0065            |
| K-Na <sub>2</sub> HPO <sub>4</sub>                | 511.21         | 1                 | 511.21       | 0.90    | 0.4132            |

**Table S3.** Central Composite design of factors with specific activity (U/mg)

| Run | Factor 1<br>Cutin (%) | Factor 2<br>NaNO <sub>3</sub> (%) | Factor 3<br>(NH <sub>4</sub> ) <sub>2</sub> SO <sub>4</sub> (%) | Response 1<br>Specific Activity U/mg |
|-----|-----------------------|-----------------------------------|-----------------------------------------------------------------|--------------------------------------|
| 1   | 0.90                  | 0.60                              | 0.80                                                            | 307.95                               |
| 2   | 0.80                  | 1.14                              | 0.68                                                            | 253.05                               |
| 3   | 0.90                  | 1.00                              | 0.55                                                            | 369.93                               |
| 4   | 0.80                  | 0.80                              | 0.68                                                            | 275.63                               |
| 5   | 0.90                  | 0.60                              | 0.55                                                            | 113.50                               |
| 6   | 0.80                  | 0.80                              | 0.68                                                            | 224.54                               |
| 7   | 0.80                  | 0.80                              | 0.68                                                            | 187.81                               |
| 8   | 0.90                  | 1.00                              | 0.80                                                            | 290.91                               |
| 9   | 0.70                  | 1.00                              | 0.55                                                            | 339.32                               |
| 10  | 0.97                  | 0.80                              | 0.68                                                            | 194.22                               |
| 11  | 0.70                  | 0.60                              | 0.80                                                            | 102.15                               |
| 12  | 0.80                  | 0.46                              | 0.68                                                            | 87.35                                |
| 13  | 0.80                  | 0.80                              | 0.68                                                            | 283.91                               |
| 14  | 0.70                  | 0.60                              | 0.55                                                            | 179.21                               |
| 15  | 0.80                  | 0.80                              | 0.68                                                            | 289.95                               |
| 16  | 0.80                  | 0.80                              | 0.46                                                            | 217.34                               |
| 17  | 0.80                  | 0.80                              | 0.68                                                            | 242.56                               |
| 18  | 0.80                  | 0.80                              | 0.89                                                            | 206.63                               |
| 19  | 0.70                  | 1.00                              | 0.80                                                            | 123.63                               |
| 20  | 0.63                  | 0.80                              | 0.68                                                            | 139.29                               |

**Table S4.** ANNOVA for Central Composite design

| Source                                            | Sum of Squares | Degree of Freedom | Means Square | F Value | p-value prob>F |
|---------------------------------------------------|----------------|-------------------|--------------|---------|----------------|
| Model                                             | 8031.59        | 6                 | 15778.90     | 6.70    | 0.002          |
| A-Cutin                                           | 535.90         | 1                 | 13561.64     | 5.75    | 0.0322         |
| B- NaNO <sub>3</sub>                              | 45.66          | 1                 | 35845.94     | 15.21   | 0.0018         |
| C-(NH <sub>4</sub> ) <sub>2</sub> SO <sub>4</sub> | 1667.59        | 1                 | 2794.08      | 1.19    | 0.2960         |
| AB                                                | 1432.53        | 1                 | 417.48       | 0.18    | 0.0468         |
| AC                                                | 13.99.10       | 1                 | 20825.80     | 8.84    | 0.0108         |
| BC                                                | 406.85         | 1                 | 21228.48     | 9.01    | 0.0102         |

Fourier-transform infrared spectra.

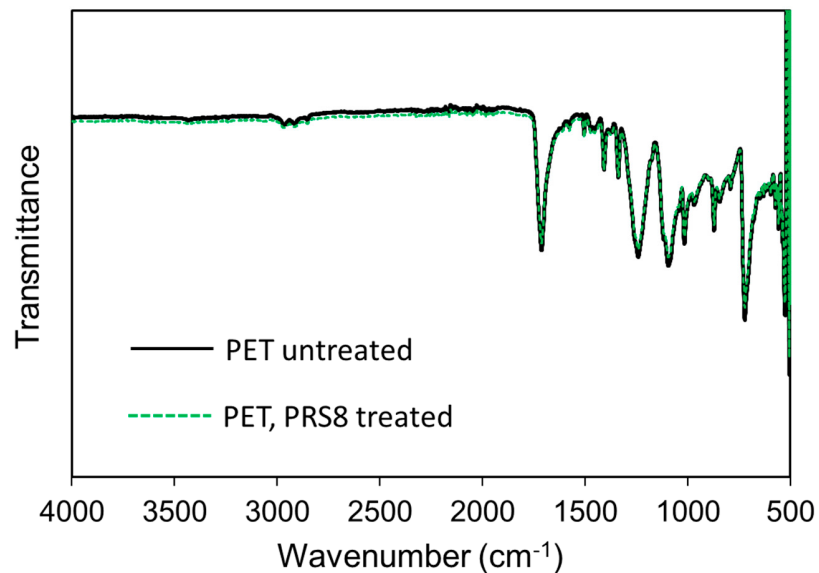

**Figure S2:** FT-IR spectra of PET (500-4000 cm<sup>-1</sup>) after 28 days abiotic control untreated (black) and PET treated with *S. maltophilia* PRS8 strain (Green dotted line).

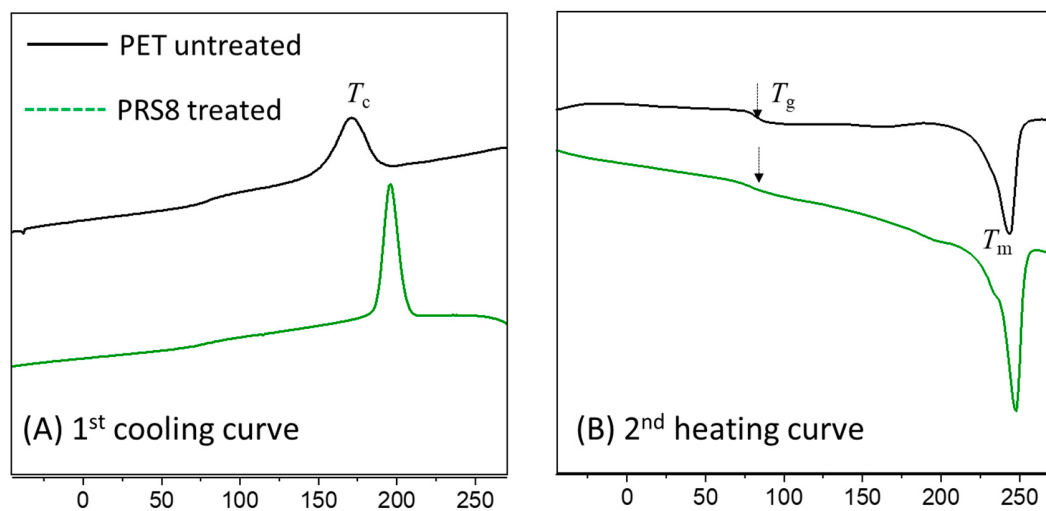

**Figure S3:** 1<sup>st</sup> cooling curve (A) and 2<sup>nd</sup> heating curve (B) from DSC measurements for powdered PET samples i.e. untreated PET powder (black) and PET treated with PRS8 strain (Green ). Peak of crystallization ( $T_c$ ) during first cooling and melting peak in second heating cycle ( $T_m$ ) is shown for untreated PET sample.  $T_g$  in second heating cycle is shown with black arrows for both PET samples.
